# Supplementary material
Source: PubMed Central journal article supplement (PMC6697154)
Supplement: NIHMS1044754-supplement-1.pdf [file NIHMS1044754-supplement-1.pdf]

**Table S1.** Neutralization of EBOV or EBOV/BDBV-GP by Various Forms of BDBV223

| Form of BDBV223    | Subclass | Neutralization activity against indicated virus<br>(IC <sub>50</sub> , µg/mL) |              |
|--------------------|----------|-------------------------------------------------------------------------------|--------------|
|                    |          | EBOV                                                                          | EBOV/BDBV-GP |
| Hybridoma-produced | IgG3     | 14.3                                                                          | 0.0000177    |
| Recombinant        | IgG1     | 0.53                                                                          | 0.0004047    |
|                    | IgG2     | 0.00069                                                                       | 0.0071740    |
|                    | IgG3     | 122.6                                                                         | 0.0006622    |
|                    | IgG4     | 122.6                                                                         | 0.0001383    |
|                    | F(ab')   | 0.09                                                                          | 0.0000199    |
