# Supplementary material
Source: PubMed Central journal article supplement (PMC6697154)
Supplement: NIHMS1044754-supplement-2.pdf [file NIHMS1044754-supplement-2.pdf]

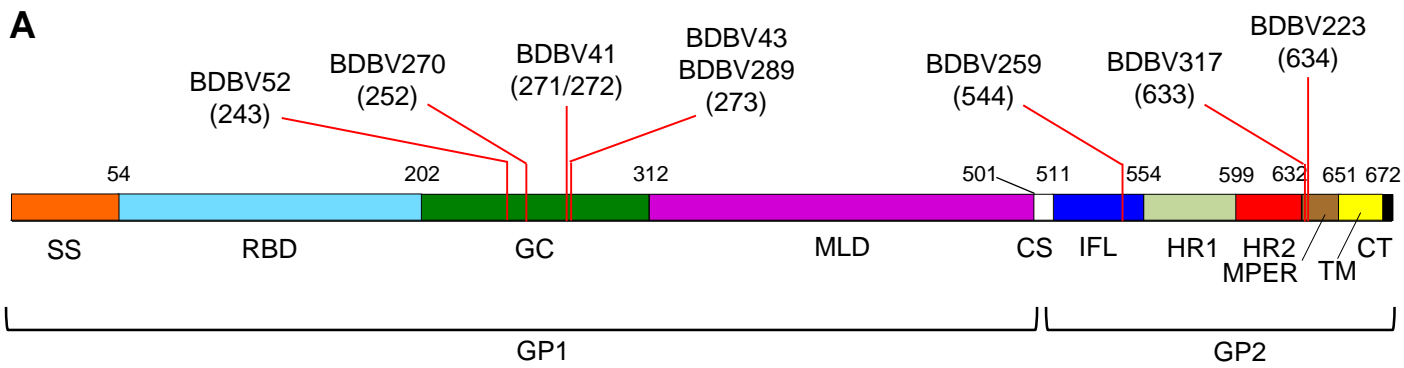

**B**

| Antibody | Subclass | Neutralization IC <sub>50</sub> , ng/mL |         |         | ELISA binding, EC <sub>50</sub> , ng/mL |         |         |
|----------|----------|-----------------------------------------|---------|---------|-----------------------------------------|---------|---------|
|          |          | BDBV-GP                                 | EBOV-GP | SUDV-GP | BDBV-GP                                 | EBOV-GP | SUDV-GP |
| BDBV52   | IgG1     | >                                       | >       | >       | 27                                      | >       | >       |
| BDBV270  | IgG1     | 182                                     | 3365    | >       | 154                                     | 173     | 159     |
| BDBV41   | IgG1     | 93                                      | >       | >       | 25                                      | >       | >       |
| BDBV43   | IgG1     | 18                                      | 506     | 308     | 29                                      | 22      | 21      |
| BDBV289  | IgG1     | 32                                      | 588     | >       | 20                                      | 29      | 103     |
| BDBV259  | IgG1     | 59                                      | >       | >       | 26                                      | >       | >       |
| BDBV317  | IgG1     | 6                                       | 2083    | >       | 9                                       | 191     | 208     |
| BDBV223  | IgG3     | <0.1                                    | 70      | >       | 22                                      | 24      | 106     |

**Fig. S1** (related to Fig. 1). **A.** Amino acid numbers (in parentheses) corresponding to escape mutations for the indicated mAb, shown on the map of BDBV GP1 and GP2 [adapted from Lee et al., 2008, *Nature* 454(7201):177-182 and Lennemann et al., 2014, *mBio*. 5(1):e00862-13]. The escape mutations were identified by serial passaging of EBOV/BDBV-GP or VSV/BDBV-GP viruses in presence of corresponding mAbs and sequencing of viral GP ORFs (see Materials and Methods). SS, signal sequence, RBD, receptor-binding domain, GC, glycan cap, MLD, mucin-like domain, CS, furin cleavage site (amino acids 501/502), IFL, internal fusion loop, HR1, heptad repeat 1, HR2, heptad repeat 2, MPER, membrane-proximal external region, TM, transmembrane domain, CT, cytoplasmic tail; positions of the first amino acid of each domain are indicated. **B.** Neutralizing and binding potencies of BDBV-specific mAbs against BDBV, EBOV and SUDV. IC<sub>50</sub> and EC<sub>50</sub> values greater than 10,000 ng/mL are indicated by a ">" symbol. The figure adapted from Ilinykh et al., 2018 (manuscript in submission).

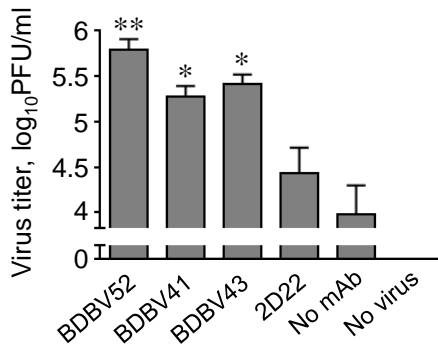

**Fig. S2** (related to Fig. 1). THP-1 monocytes infected with EBOV/BDBV-GP in presence of mAb release infectious viral particles to the media. Cells were incubated with mAbs at 100  $\mu$ g/ml, infected at an MOI of 1 PFU/cell for 1 hour, washed, and supplemented with fresh medium with no mAbs added. In 48 hours, THP-1 supernatants were collected, and virus titer was determined by plaque assay. Mean values  $\pm$ SD based on triplicate samples. Limit of detection: 20 PFU/ml. Differences to no antibody control: \*  $p < 0.01$ , \*\*  $p < 0.001$  (Unpaired t-test).

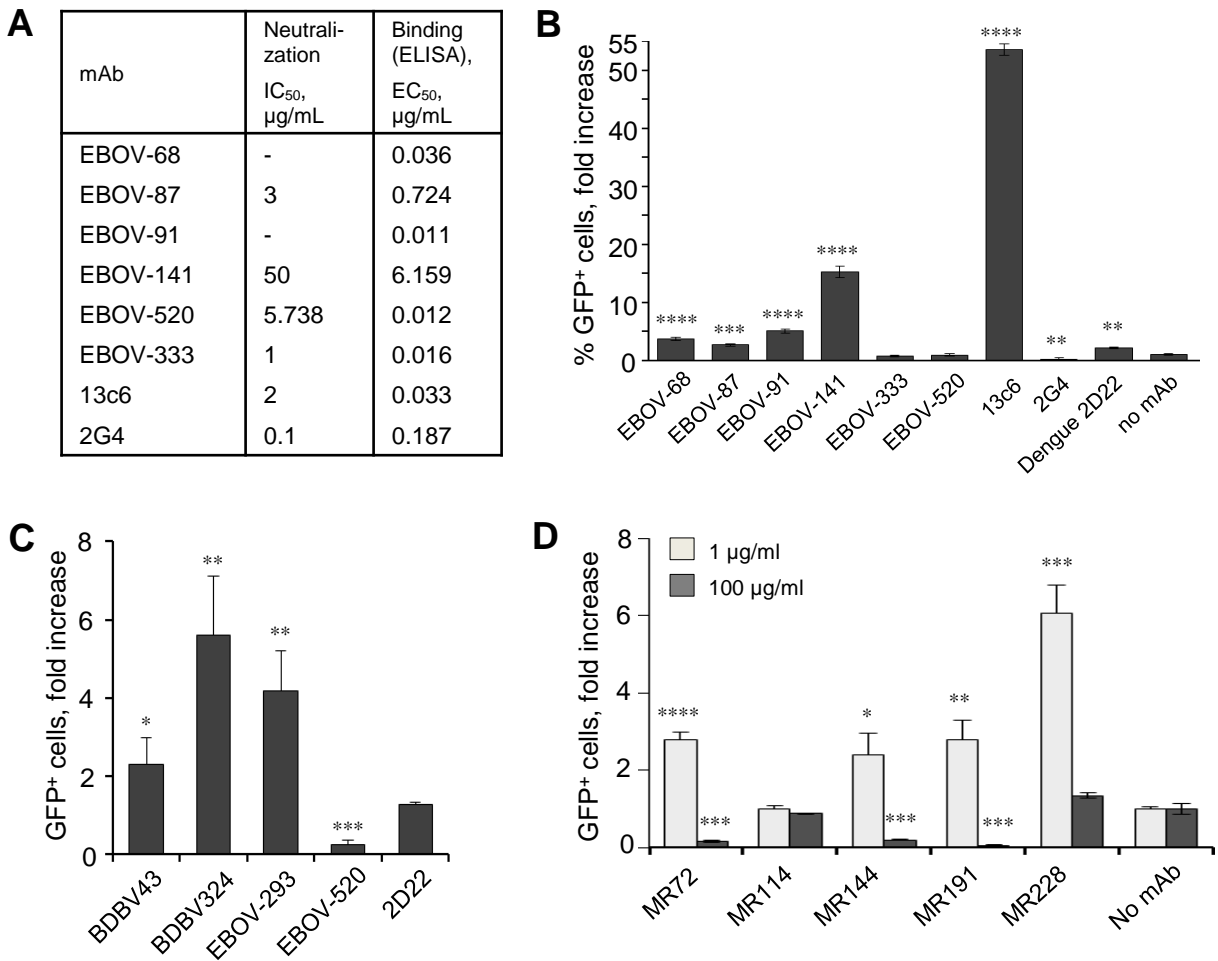

**Fig. S3** (related to Fig. 1). ADE of additional filovirus species infections. **A**. Neutralizing and binding properties of mAbs isolated from EBOV survivors or two humanized murine mAb components of zMapp. **B-D**, fold increases of infected (eGFP<sup>+</sup>) THP-1 cells after inoculation with EBOV (**B**), EBOV/SUDV-GP (**C**) or EBOV/MARV-GP (**D**) in presence of 100 µg/mL (**B**) or 10 µg/mL (**C**) of the indicated mAb. Mean values ± SD based on triplicate samples. Differences to controls: \* p<0.05, \*\* p<0.01, \*\*\* p<0.001, \*\*\*\* p<0.0001 (**B, C**, Unpaired t-test, **D**, Multiple t-test).

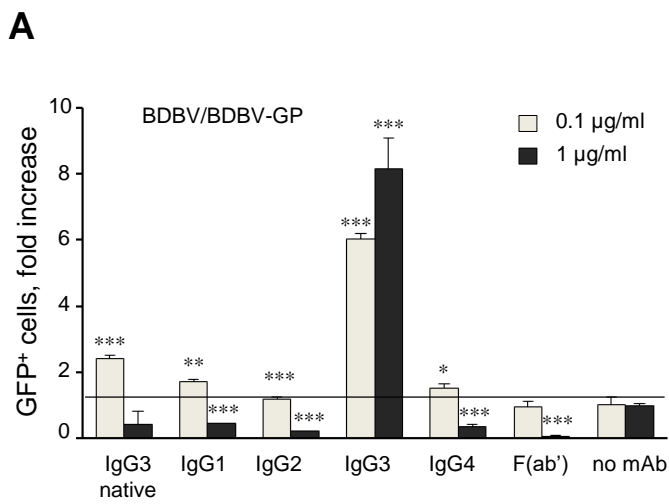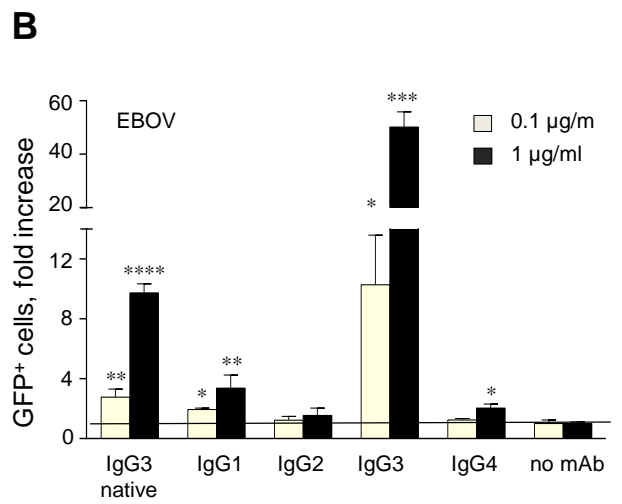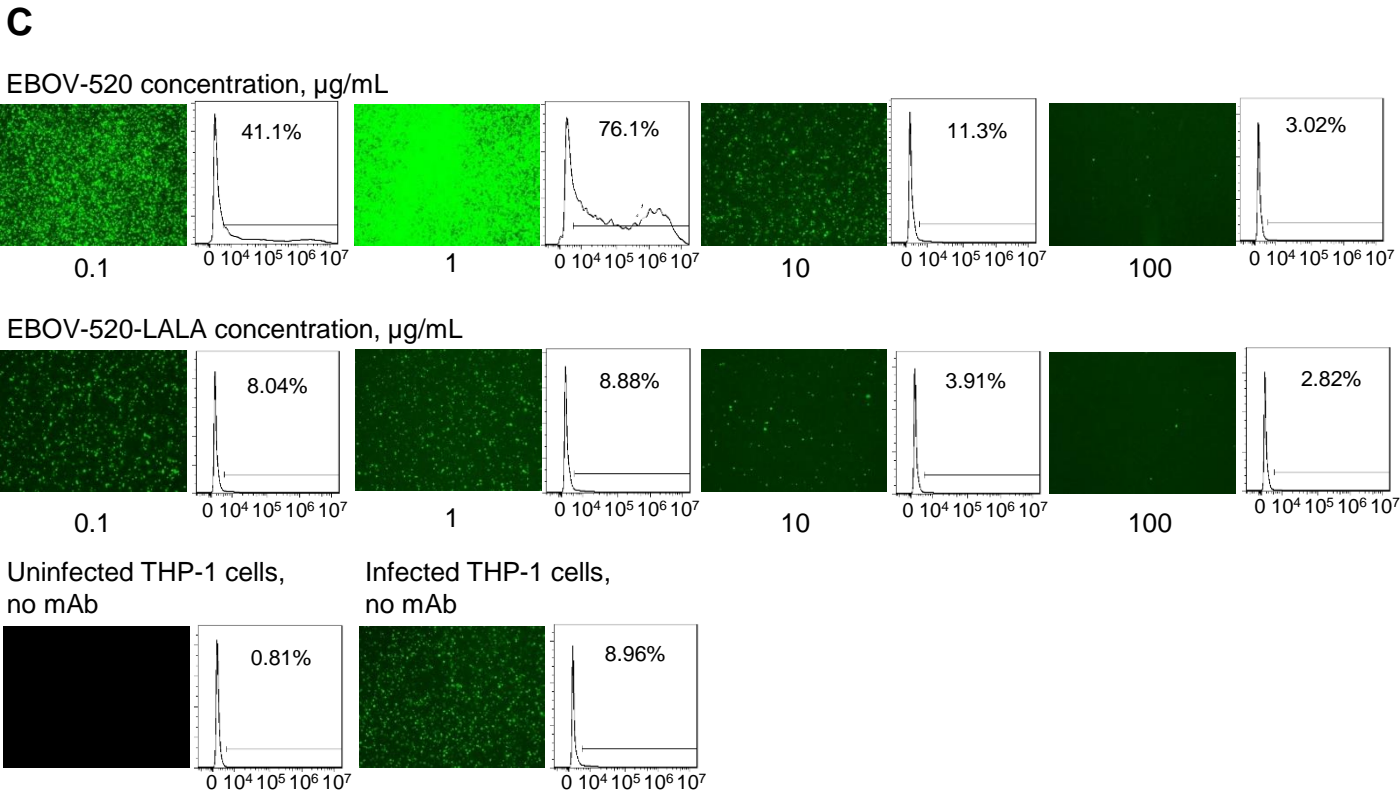

**Fig. S4** (related to Fig. 3). ADE depends on the Fc fragment of recombinant IgG. THP-1 cells inoculated with EBOV/BDBV-GP (**A**) or EBOV (**B**) in the presence of hybridoma-produced BDBV223, which is IgG3 (IgG3 native), or its recombinant forms of various subclasses at the indicated concentrations. Mean values  $\pm$  SD based on triplicate samples. Differences to no antibody control: \*  $p < 0.05$ , \*\*  $p < 0.01$ , \*\*\*  $p < 0.001$ , \*\*\*\*  $p < 0.0001$  (Multiple t-test). **C**. The LALA mutation of EBOV-520 IgG1 abrogates ADE *in vitro*. Fluorescent microscopy and flow cytometry analysis of eGFP<sup>+</sup> THP-1 cells inoculated with EBOV-eGFP at MOI of 1.0 PFU/cell and treated with the indicated concentrations of EBOV-520 IgG1, EBOV-520 IgG1/LALA, or incubated with no mAb.

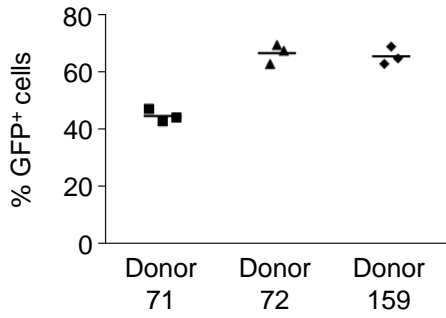

**Fig. S5** (related to Fig. 4). The percentages of infected Vero E6 cells after co-cultivation with infected PBMCs. Isolated PBMCs were infected with EBOV/BDBV-GP at an MOI of 1 PFU/cell. At 24 hours after infection, they were harvested and placed atop of the Vero E6 cell monolayers. After 48 hours of co-cultivation, Vero E6 cells were analyzed by flow cytometry. Values for individual donors are indicated by symbols, and mean values are indicated by horizontal bars.
